# Supplementary material for: Intrinsic Photosensitivity Enhances Motility of T Lymphocytes
Source: PubMed Central journal article supplement (PMC5171715; doi:10.1038/srep39479), 2016-12-20
Supplement: srep39479-s1.pdf [file srep39479-s1.pdf]

## Supplementary Information

“Intrinsic Photosensitivity Enhances Motility of T Lymphocytes” by Phan X. Thieu, Barbara Jaruga, Sandeep C. Pingle, Bidhan C. Bandyopadhyay, & Gerard P. Ahern

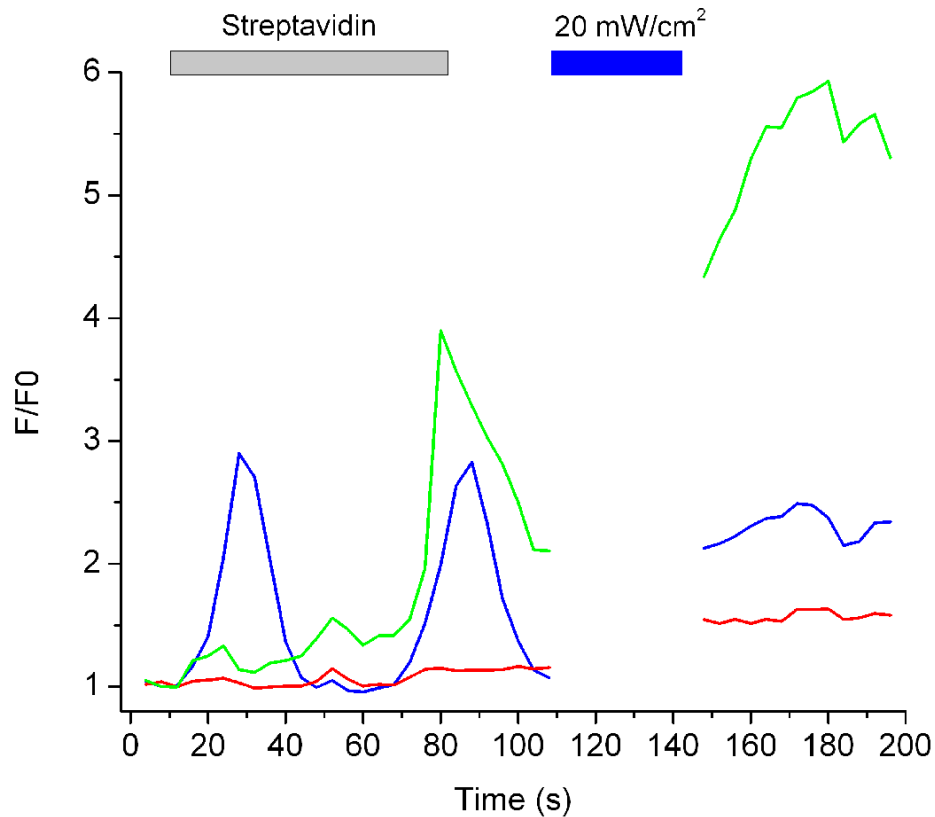

**Supplementary Figure 1. Comparison of Ca<sup>2+</sup> responses evoked by T cell receptor mediated signaling and blue light irradiation.** Mouse CD4<sup>+</sup> T cells were incubated with 5  $\mu$ g/ml biotinylated anti-CD3 antibody (BD Biosciences) for 10 min at RT followed by cross-linking with 5  $\mu$ g/ml streptavidin (Pierce Chemical Co.) as indicated. A 30 s pulse of blue light (20 mW cm<sup>-2</sup>) was used to trigger photosignaling. Ca<sup>2+</sup> imaging was performed in Fluo4 loaded cells. The dye was excited with low intensity blue light (0.8 mW cm<sup>-2</sup>)

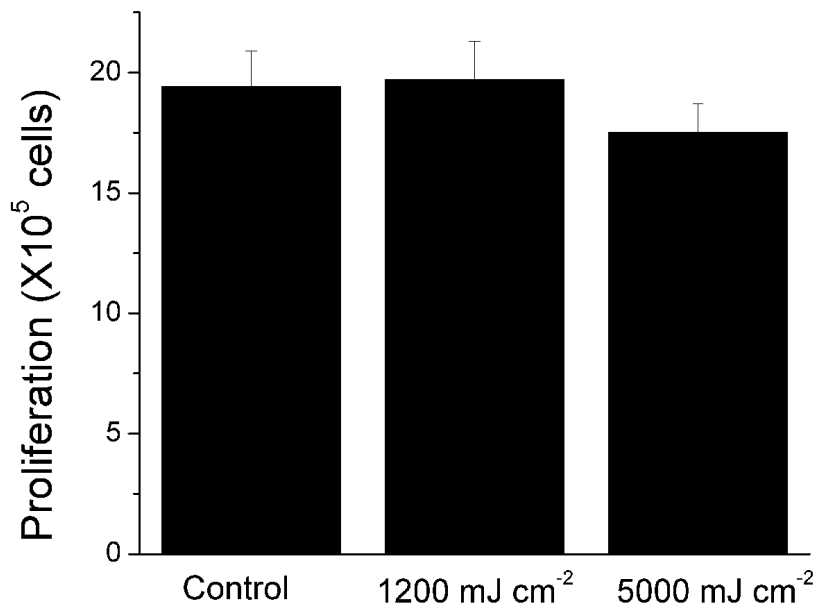

**Supplementary Figure 2. Light treatment does not affect T cell proliferation.** Mouse splenocytes were stimulated with plate bound anti-CD3 antibody (10  $\mu\text{g/ml}$ ) for 3 days with or without daily irradiation with full spectrum light. Cell were counted using MTT assay.

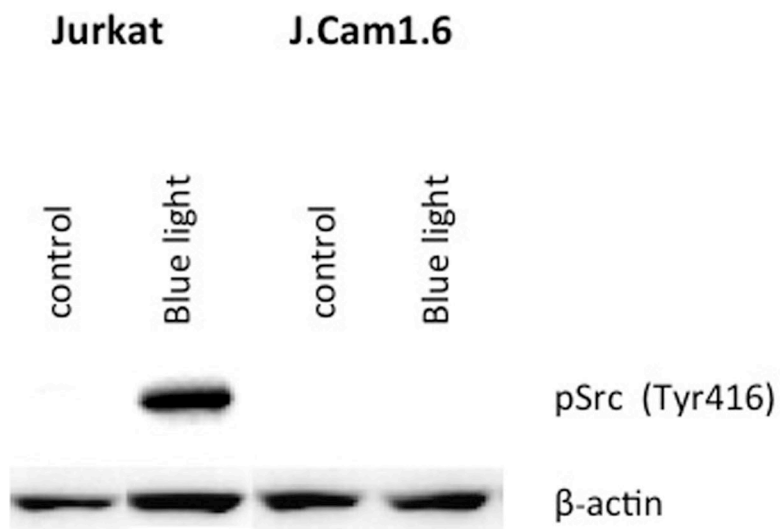

**Supplementary Figure 3. Lck activation by light in Jurkat and Lck-null Jurkat cells.** Blue light induces phosphorylation of Src kinase as detected with a generic pSrc antibody (mouse Y416). The prominent immunoreactive band is absent in J.Cam1.6 (Lck-null) cells confirming predominant activation of Lck.

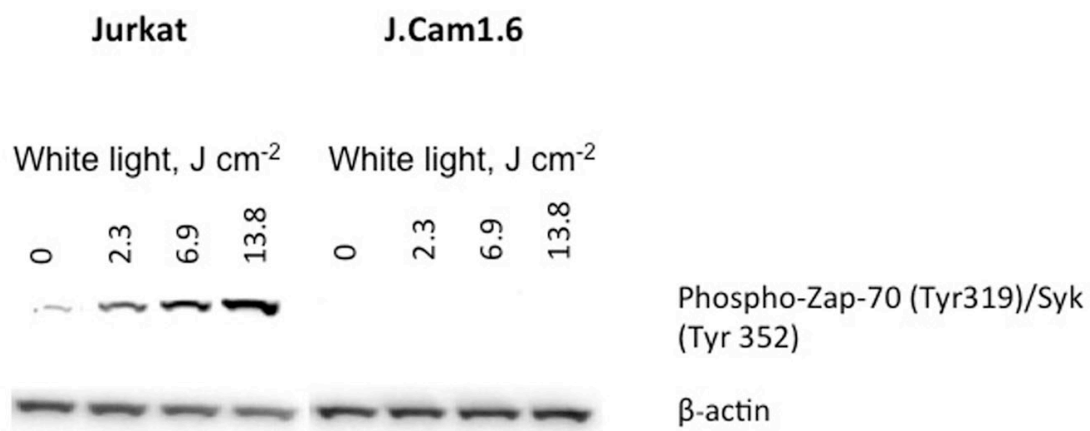

**Supplementary Figure 4. White light activates Zap-70 in a Lck-dependent manner.**  
 Induction of phospho-Zap-70 by white light in Jurkat and J.Cam1.6 (Lck-deficient) cells.

A

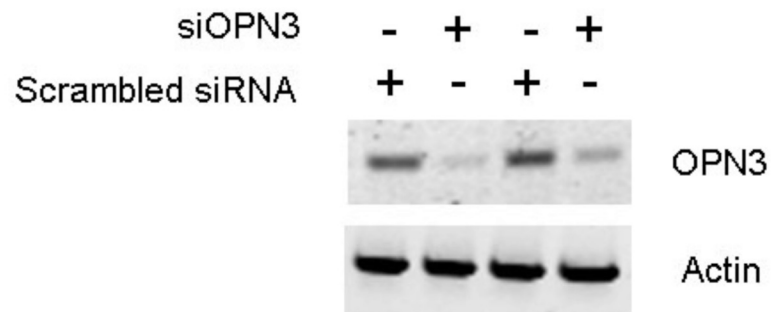

B

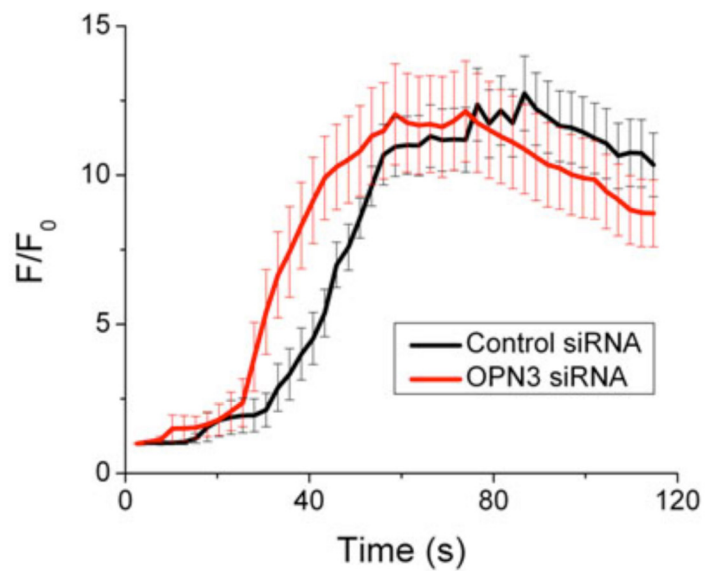

**Supplementary Figure 5. Opsin 3 (OPN3) does not contribute to light signaling in Jurkat cells.** **A**, inhibition of Opsin 3 mRNA expression in Jurkat cells by siRNA. **B**, inhibition of Opsin 3 mRNA expression does not disrupt blue light-evoked Ca<sup>2+</sup> signaling.

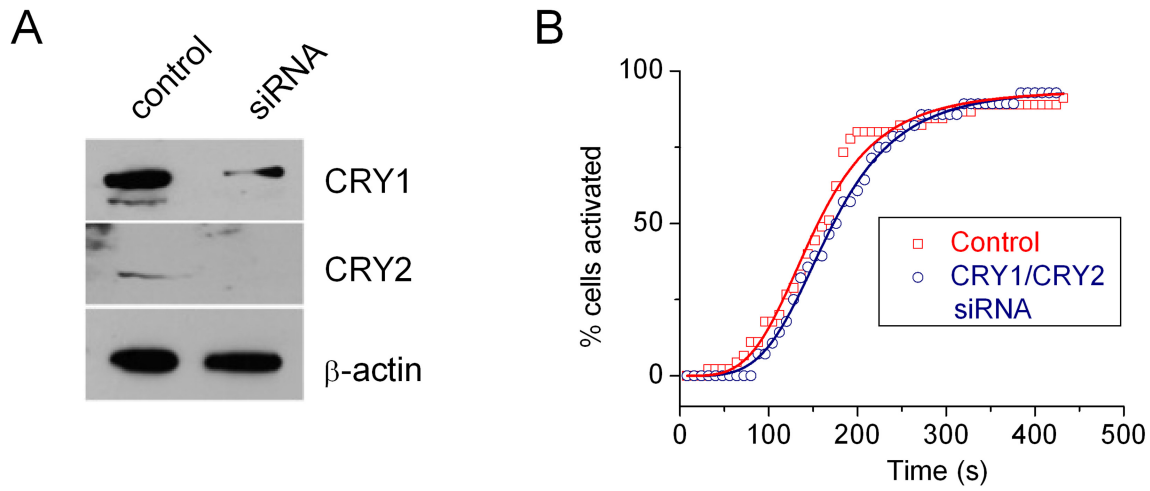

**Supplementary Figure 6. Light activates Ca<sup>2+</sup> independently of Cryptochrome proteins.** Inhibiting protein expression of cryptochrome 1&2 (CRY1&2) (A) in Jurkat cells does not affect light-evoked Ca<sup>2+</sup> signaling (B).

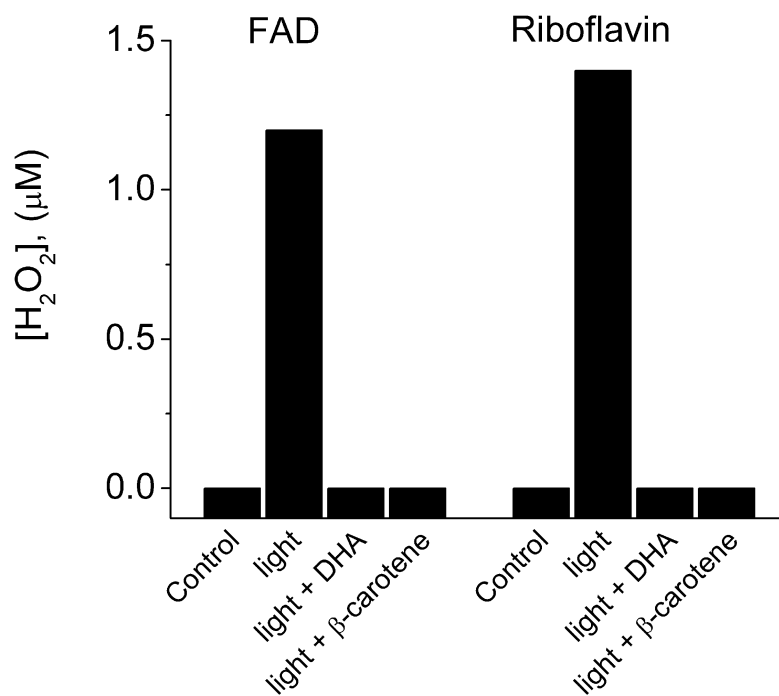

**Supplementary Figure 7. Blue light irradiation of riboflavin and flavin adenine dinucleotide generates H<sub>2</sub>O<sub>2</sub>.** Solutions containing 5 μM of riboflavin or flavin adenine dinucleotide were irradiated with 600 mJ cm<sup>-2</sup> blue light with or without docosahexaenoic acid or β-carotene (10 μM). [H<sub>2</sub>O<sub>2</sub>] was measured using a colorimetric Oxired assay (Abcam).

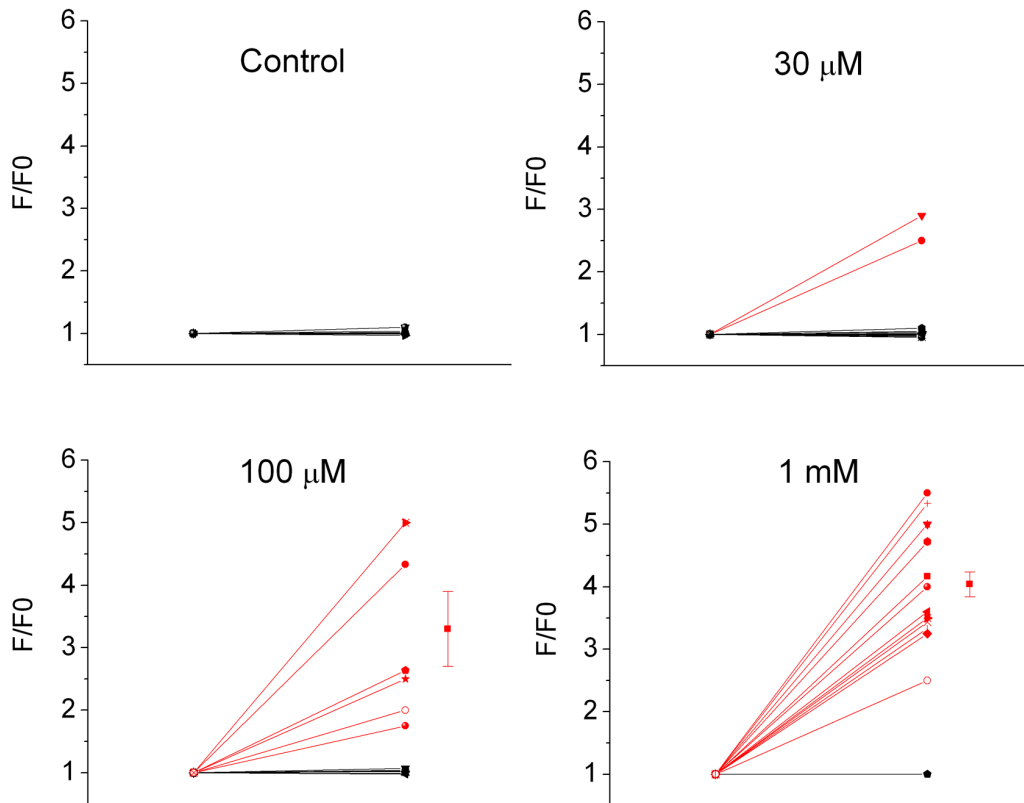

**Supplementary Figure 8.  $\text{H}_2\text{O}_2$  increases intracellular  $[\text{Ca}^{2+}]$  in Jurkat cells.** Fluo4 fluorescence in individual cells before and after a two-minute exposure to 0, 30, 100  $\mu\text{M}$  and 1 mM  $\text{H}_2\text{O}_2$  (n=12-15 cells). Non-responding and responding cells are denoted as black and red respectively. Note that  $\text{H}_2\text{O}_2$  in a concentration dependent manner increases the number of responding cells. Mean  $F/F_0$  ( $3.3 \pm 0.6$  and  $4.1 \pm 0.2$ ) was not significantly different ( $P=0.15$ ) for 100  $\mu\text{M}$  and 1 mM treatments.  $F_0$  was measured using  $<10 \text{ mJ cm}^{-2}$  blue light that did not affect subsequent fluorescence measured 2 minutes later.



3b

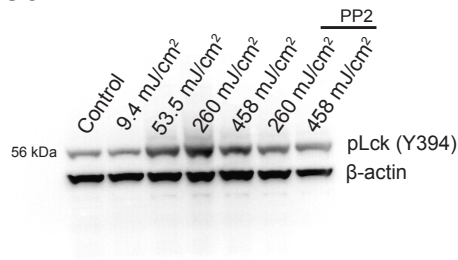

3f

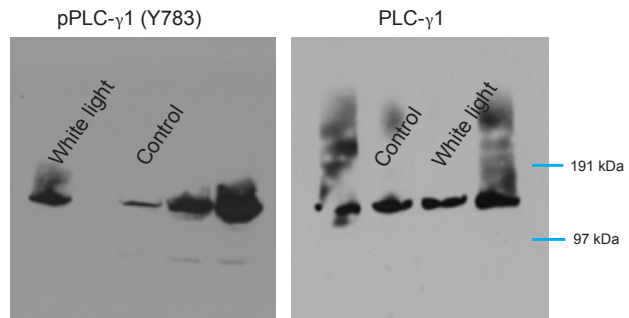

3d

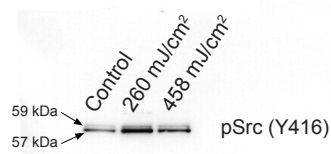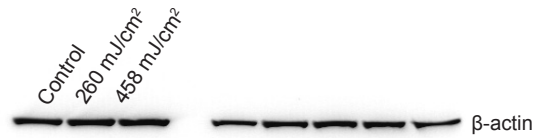

3,4e

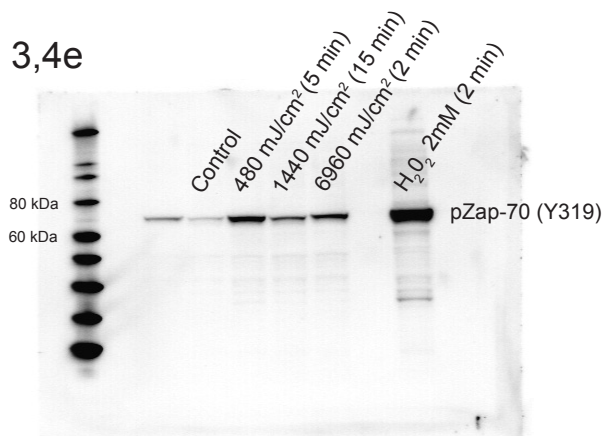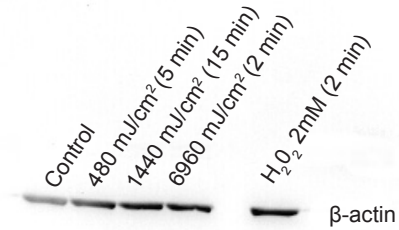

4d

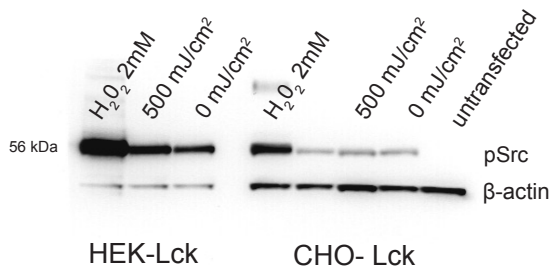

4e

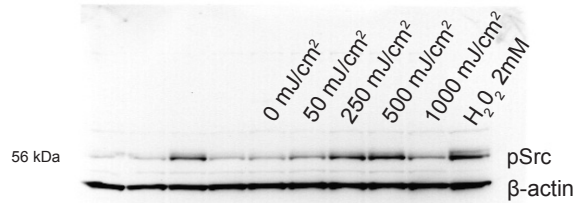

Supplementary Figure 9. Full-sized immunoblots for Figures 3b-f, 4d&4e.

**Supplementary Movie 1.** Blue light irradiation ( $5 \text{ mW cm}^{-2}$ ) stimulates an increase in  $[\text{Ca}^{2+}]$  in Jurkat T cells; 7.5x speed.

**Supplementary Movie 2.** Single cell  $\text{Ca}^{2+}$  and motility response to blue light (488 nm laser  $2.7 \text{ mW cm}^{-2}$ ; 20x speed).

**Supplementary Movie 3.** Blue light triggers extension of lamellipodia in Jurkat cells (488 nm laser  $2.7 \text{ mW cm}^{-2}$ ,  $37^\circ\text{C}$ , 20x speed).
